# Supplementary material for: Effectiveness of lower limb rehabilitation protocol using mobile health on quality of life, functional strength and functional capacity among knee osteoarthritis patients who were overweight and obese: A randomized controlled trial
Source: medRxiv preprint, doi:10.1101/2022.01.05.21268595, version 1 (2022-01-10)
Supplement: Supplementary Files 1 [file 268595_file09.docx]

**Additional file 1:** Screen View for Sending the Text Messages

Assalamualaikum,

This is reminder to carry out the LLRP and IDC.

Your week/weeks………of training is going on.

Please follow it for a better life.

Your Caring Doctor

Muhammad Tariq Rafiq
